# Supplementary material for: High circulating elafin levels are associated with Crohn’s disease-associated intestinal strictures
Source: PubMed Central journal article supplement (PMC7156098; doi:10.1371/journal.pone.0231796), 2020-04-14

S1 Figure

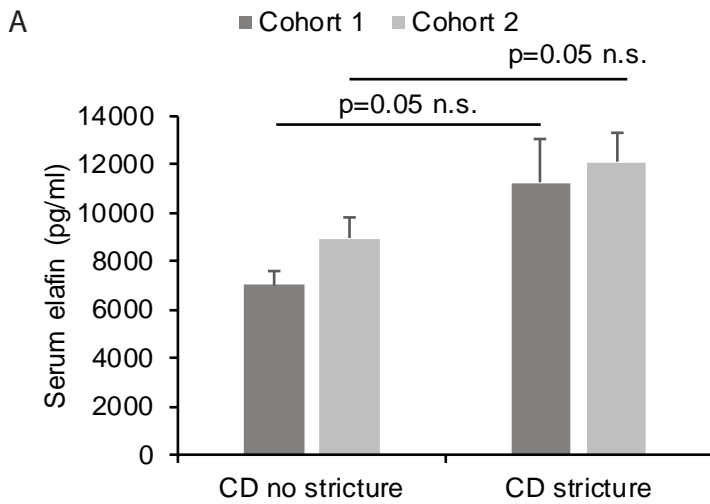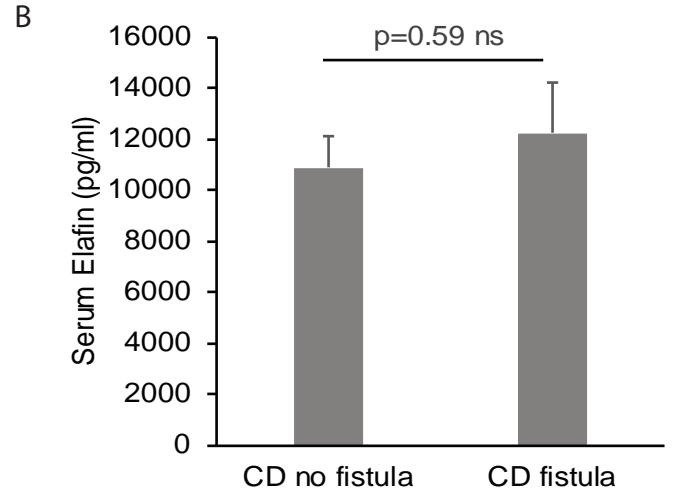

**C**

CD clinical remission

|                  | others    | HBI=0-4   | Total       |
|------------------|-----------|-----------|-------------|
| Elafin<8000pg/ml | 10        | 23        | 35          |
| others           | 21        | 14        | 33          |
| <b>Total</b>     | <b>31</b> | <b>37</b> | <b>68</b>   |
|                  | estimated | 95% CI    | 95% CI      |
|                  | value     | lower     | upper       |
| prevalence       | 0.54      | 0.42      | 0.66        |
| sensitivity      | 0.62      | 0.44      | 0.77        |
| specificity      | 0.68      | 0.49      | 0.83        |
| PPV              | 0.70      | 0.51      | 0.84        |
| NPV              | 0.60      | 0.42      | 0.76        |
| odds ratio       | 3.45      | 1.26      | 9.42        |
| Significance     | p=0.016   |           | significant |

**D**

CD moderate or severe clinical activity

|                  | others    | HBI>=8    | Total       |
|------------------|-----------|-----------|-------------|
| Elafin>8000pg/ml | 20        | 15        | 35          |
| others           | 30        | 3         | 33          |
| <b>Total</b>     | <b>50</b> | <b>18</b> | <b>68</b>   |
|                  | estimated | 95% CI    | 95% CI      |
|                  | value     | lower     | upper       |
| prevalence       | 0.26      | 0.17      | 0.39        |
| sensitivity      | 0.83      | 0.58      | 0.96        |
| specificity      | 0.60      | 0.45      | 0.73        |
| PPV              | 0.43      | 0.27      | 0.60        |
| NPV              | 0.91      | 0.75      | 0.98        |
| odds ratio       | 7.5       | 1.92      | 29.3        |
| Significance     | p=0.0038  |           | significant |

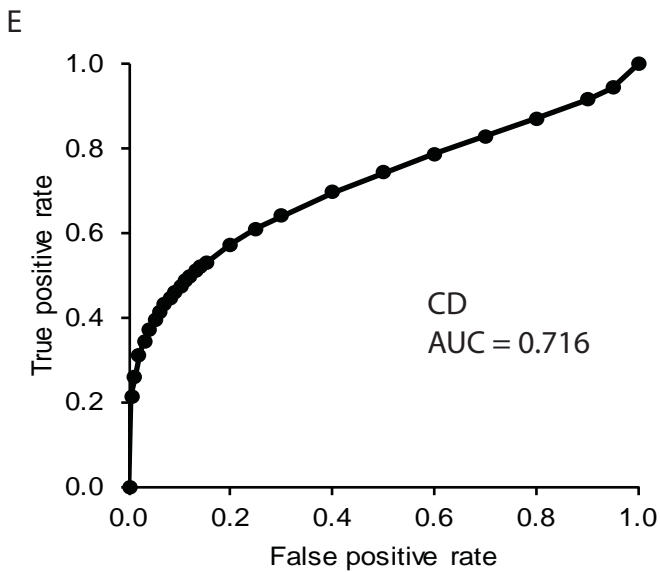

Supplement: pone.0231796.s004.pdf [file pone.0231796.s004.pdf]
