# Supplementary material for: High circulating elafin levels are associated with Crohn’s disease-associated intestinal strictures
Source: PubMed Central journal article supplement (PMC7156098; doi:10.1371/journal.pone.0231796), 2020-04-14

S2 Figure

**A UC clinical remission**

|                   | others          | PMS=0-1      | Total        |
|-------------------|-----------------|--------------|--------------|
| Elafin<18000pg/ml | 33              | 27           | 24           |
| others            | 22              | 2            | 60           |
| <b>Total</b>      | <b>55</b>       | <b>29</b>    | <b>84</b>    |
|                   | estimated value | 95% CI lower | 95% CI upper |
| prevalence        | 0.35            | 0.25         | 0.46         |
| sensitivity       | 0.93            | 0.76         | 0.99         |
| specificity       | 0.40            | 0.27         | 0.54         |
| PPV               | 0.45            | 0.32         | 0.58         |
| NPV               | 0.92            | 0.72         | 0.99         |
| odds ratio        | 9               | 1.94         | 41.74        |
| Significance      | p=0.005         | significant  |              |

**B UC moderate or severe clinical activity**

|                   | others          | PMS=5-9         | Total        |
|-------------------|-----------------|-----------------|--------------|
| Elafin>18000pg/ml | 16              | 8               | 24           |
| others            | 49              | 11              | 60           |
| <b>Total</b>      | <b>65</b>       | <b>19</b>       | <b>84</b>    |
|                   | estimated value | 95% CI lower    | 95% CI upper |
| prevalence        | 0.22            | 0.14            | 0.33         |
| sensitivity       | 0.42            | 0.21            | 0.66         |
| specificity       | 0.75            | 0.63            | 0.85         |
| PPV               | 0.33            | 0.16            | 0.55         |
| NPV               | 0.82            | 0.69            | 0.9          |
| odds ratio        | 2.23            | 0.76            | 6.50         |
| Significance      | p=0.1429        | not significant |              |

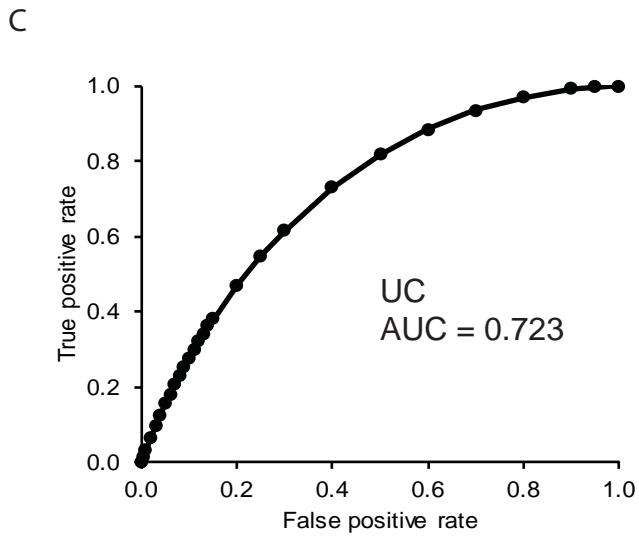

Supplement: pone.0231796.s005.pdf [file pone.0231796.s005.pdf]
